# Supplementary material for: Structural modulation of silver complexes and their distinctive catalytic properties
Source: Royal Society of Chemistry journal article supplement (doi:10.1039/c3dt52655k), 2013-10-25
Supplement: c3dt52655k.pdf [file c3dt52655k.pdf]

## Electronic supplementary information (ESI)

### Structural Modulation of Silver Complexes and Their Distinctive Catalytic Properties

Yue Zhao,<sup>a</sup> Kai Chen,<sup>a</sup> Jian Fan,<sup>b</sup> Taka-aki Okamura,<sup>c</sup> Yi Lu,<sup>a</sup> Li Luo,<sup>a</sup> Wei-Yin Sun\*<sup>a</sup>

<sup>a</sup> Coordination Chemistry Institute, State Key Laboratory of Coordination Chemistry, School of Chemistry and Chemical Engineering, Nanjing University, Nanjing 210093, China. E-mail: [sunwy@nju.edu.cn](mailto:sunwy@nju.edu.cn); Fax: +86 25 8331 4502

<sup>b</sup> Jiangsu Key Laboratory for Carbon-Based Functional Materials and Devices, Institute of Functional Nano and Soft Materials (FUNSOM), Soochow University, Suzhou 215123, China

<sup>c</sup> Department of Macromolecular Science, Graduate School of Science, Osaka University, Toyonaka, Osaka 560-0043, Japan

**Table S1** Distances [Å] and angles [°] of hydrogen bonding for complexes **1** - **3**<sup>a</sup>

| D-H ... A <sup>b</sup> | Distance (D ... A <sup>b</sup> ) | D-H-A <sup>b</sup> | Angle (D-H-A <sup>b</sup> ) |
|------------------------|----------------------------------|--------------------|-----------------------------|
| <b>1</b>               |                                  |                    |                             |
| C5-H5B ... F4#1        | 3.444                            | C5-H5B-F4          | 152                         |
| C6-H6B ... O7#2        | 3.260                            | C6-H6B-O7          | 140                         |
| C8-H8B ... O5#3        | 3.031                            | C17-H17A-O8        | 100                         |
| C23-H23B ... O6#4      | 2.980                            | C23-H23B-O6        | 98                          |
| C25-H25A ... O8#5      | 3.142                            | C25-H25A-O8        | 139                         |
| <b>2</b>               |                                  |                    |                             |
| C2-H2A ... F2#6        | 2.614(4)                         | C2-H2A-F2          | 124                         |
| <b>3</b>               |                                  |                    |                             |
| C19-H7 ... O4#7        | 3.170(12)                        | C1-H1-F6           | 131                         |
| C19-H7 ... O3#8        | 3.411(10)                        | C4-H4-F1           | 148                         |
| C29-H15 ... O2#9       | 2.668(3)                         | C29-H15-O2         | 151                         |

<sup>a</sup> Symmetry codes for **1-3**: #1: -x, 1/2+y, -1/2-z; #2: -1+x, 3/2-y, 1/2+z; #3: x, 3/2-y, -1/2+z; #4: -1+x, 3/2-y, 1/2+z; #5: -x, 2-y, -z; #6: 2-x, -y, 1-z; #7: -1/2+x, 1/2+y, z; #8: 1/2-x, 3/2-y, 1-z; #9: 1/2-x, 1/2-y, 1-z. <sup>b</sup> D: donor; A: acceptor

### NMR spectra

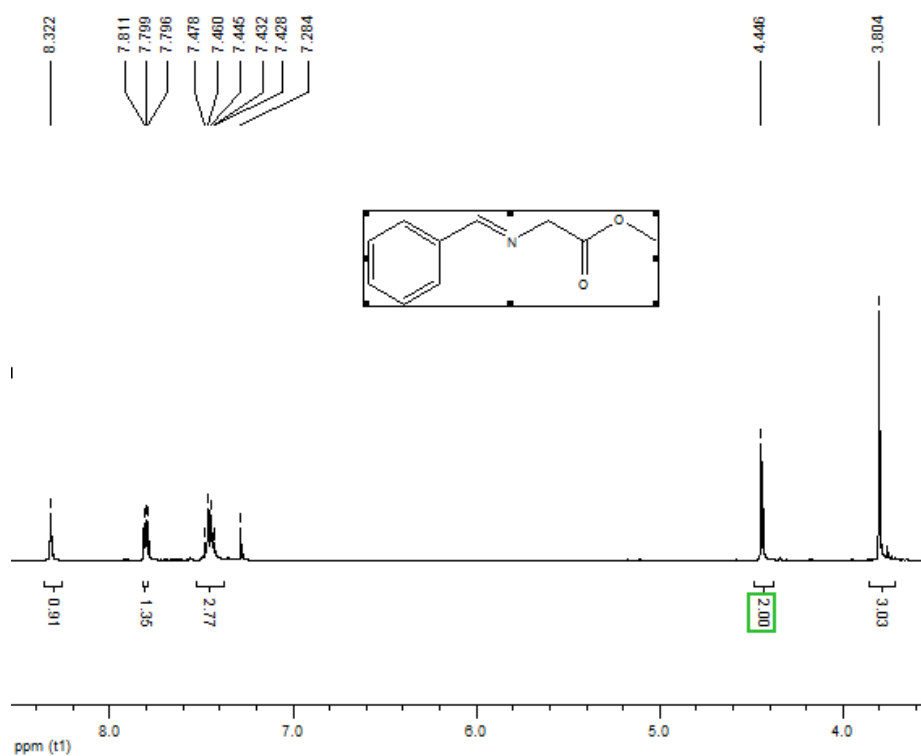

Figure S1

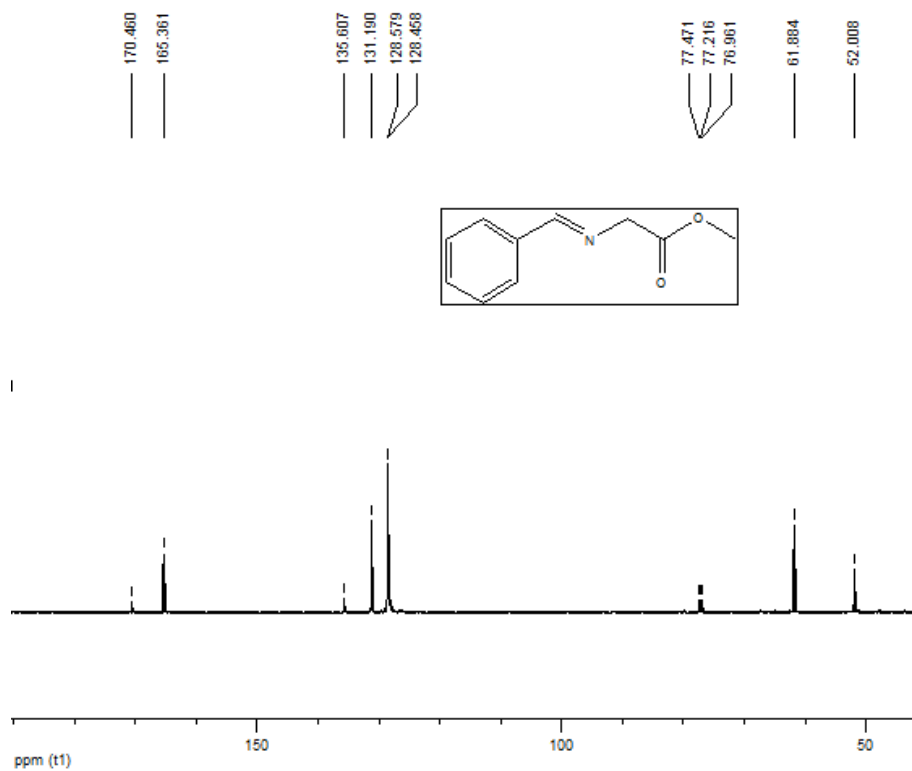

Figure S2

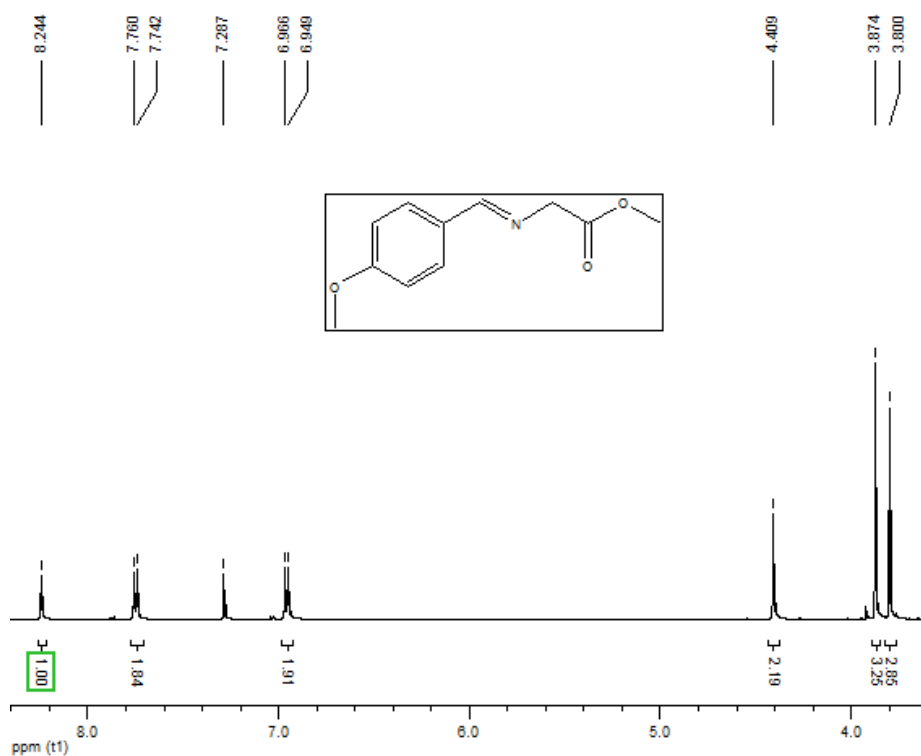

Figure S3

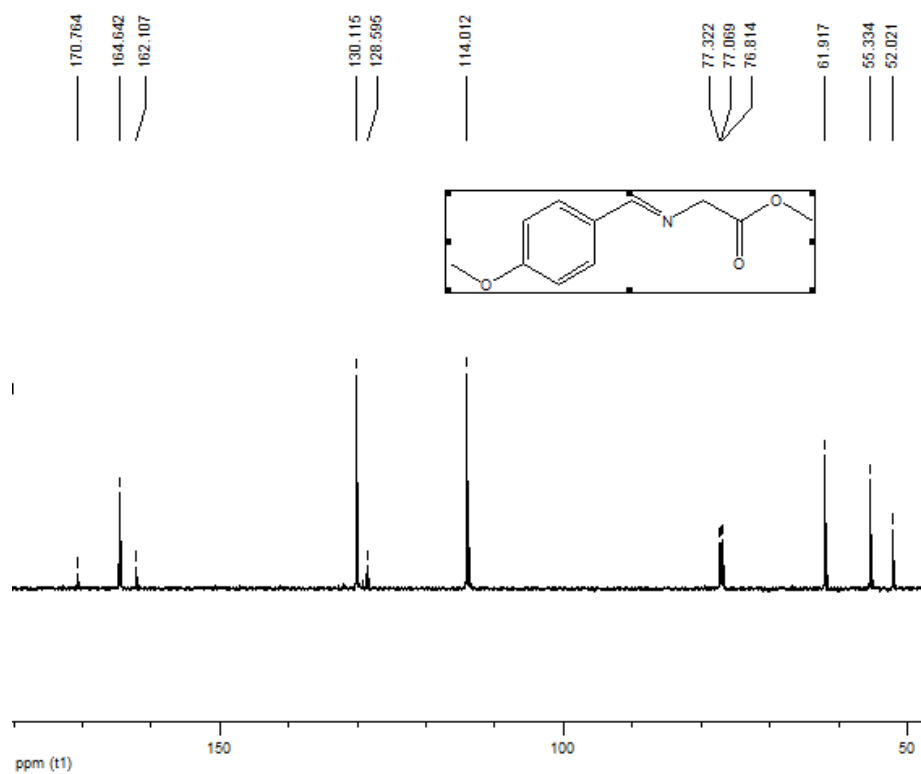

Figure S4

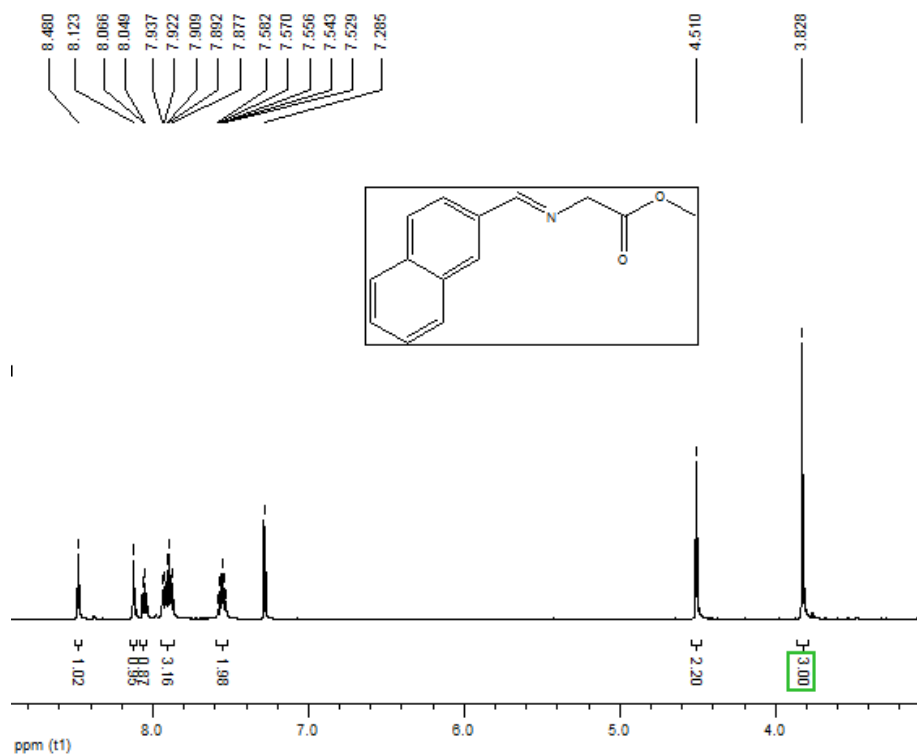

Figure S5

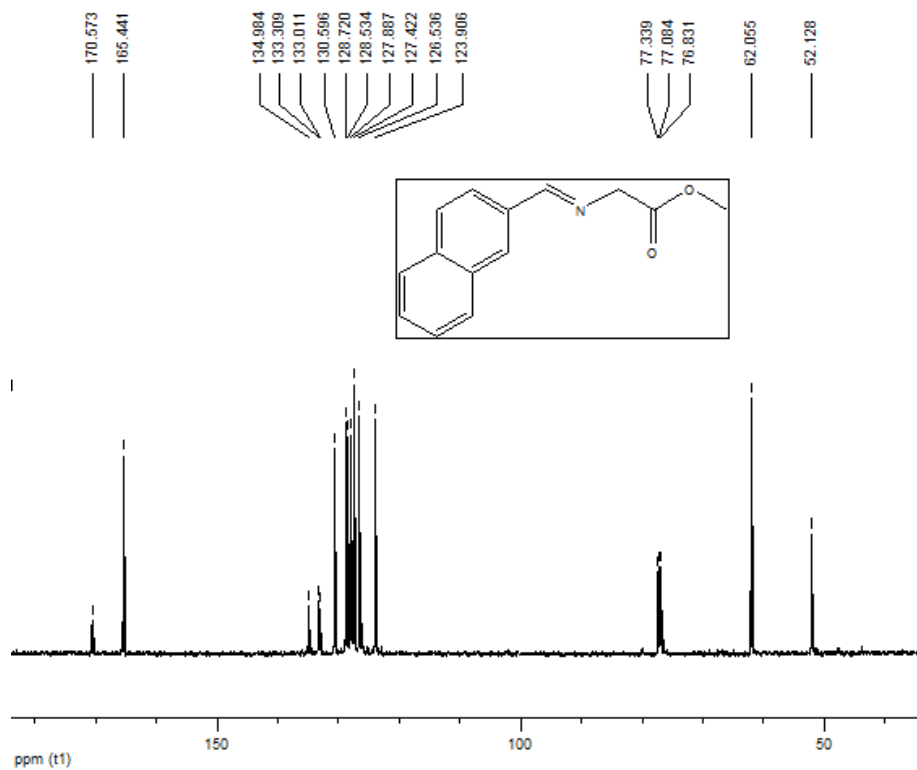

Figure S6

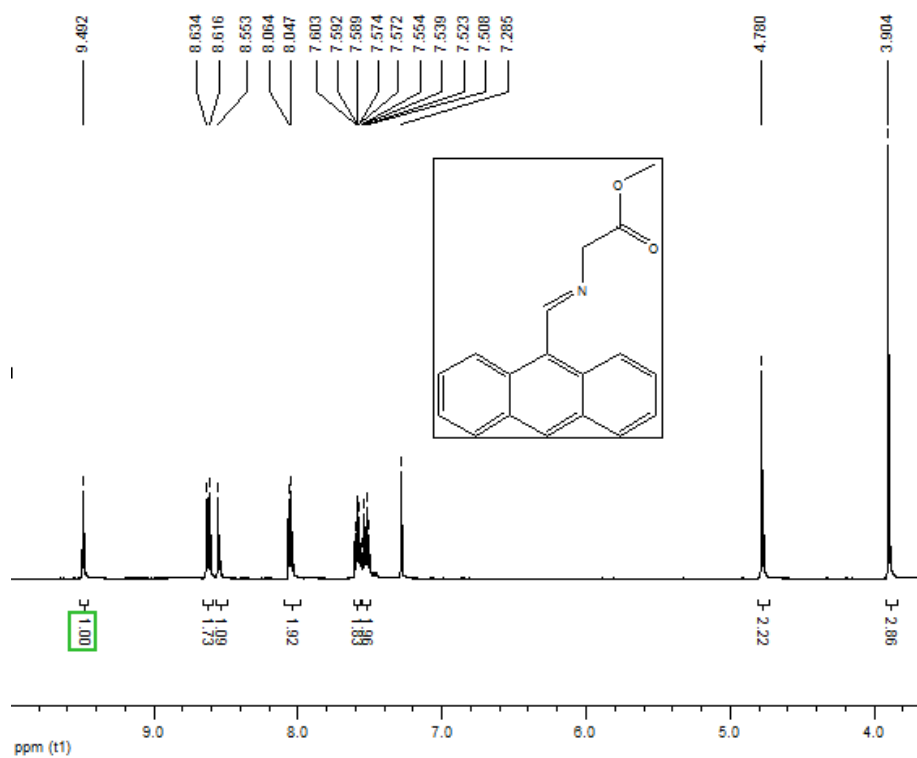

Figure S7

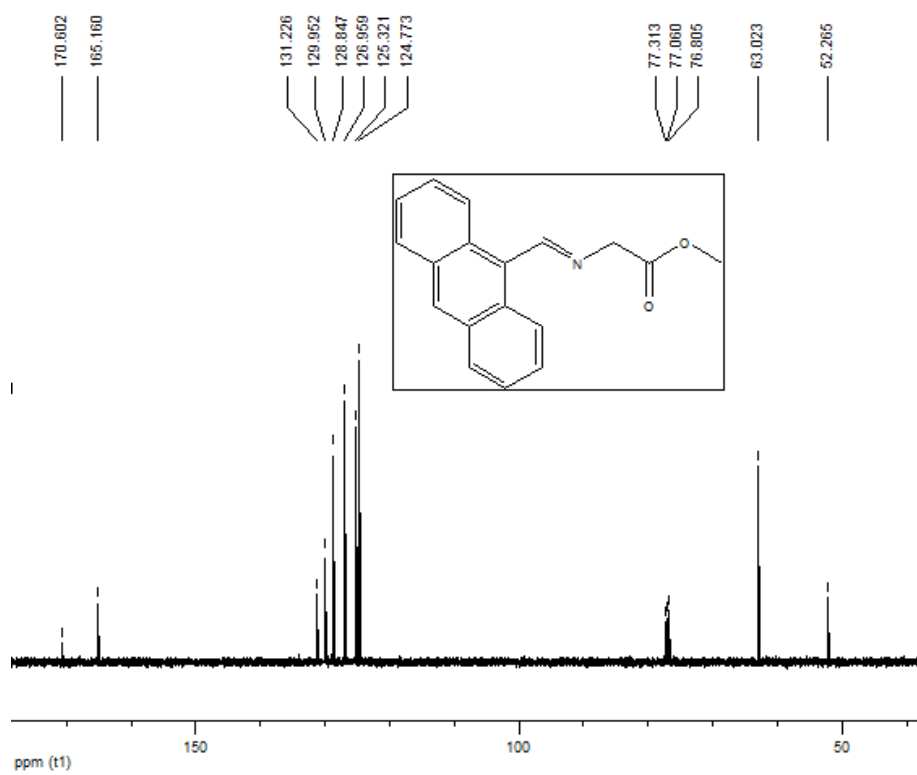

Figure S8

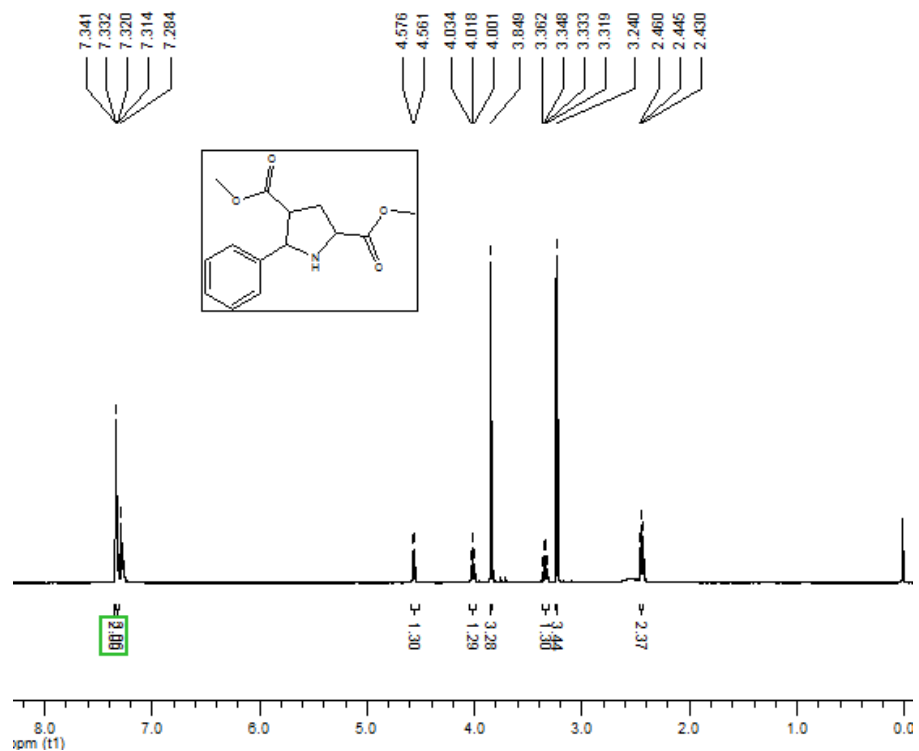

Figure S9

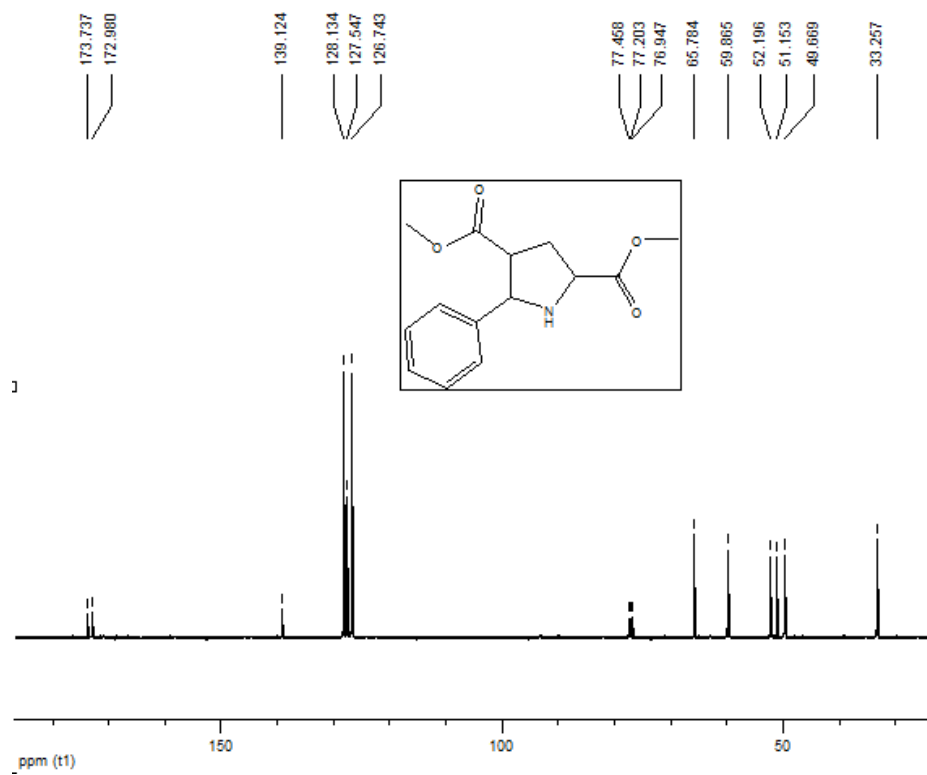

Figure S10

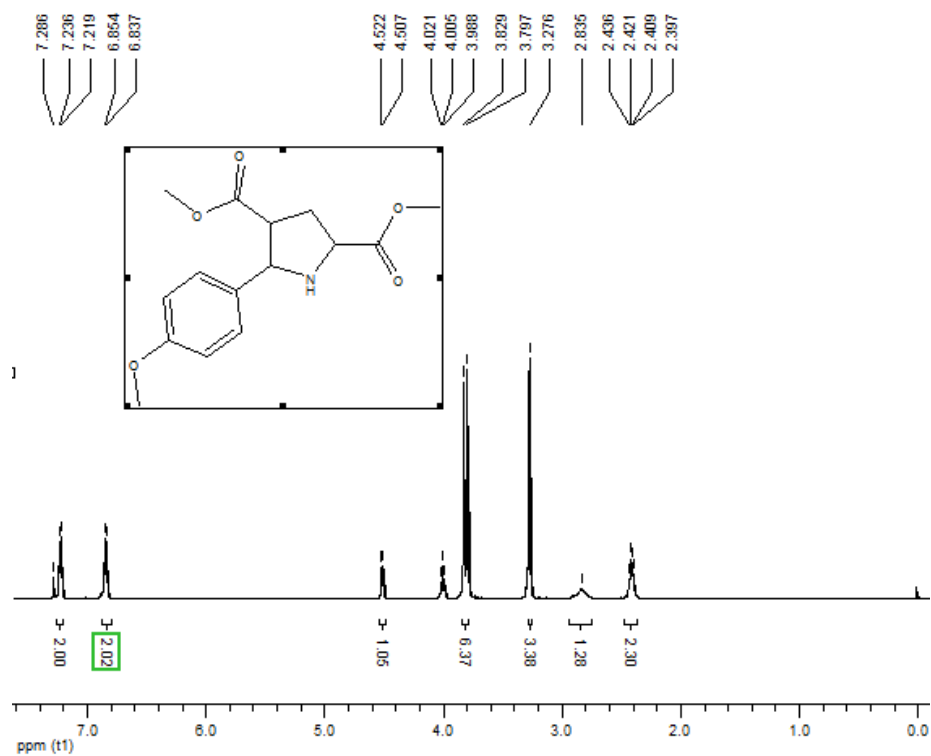

Figure S11

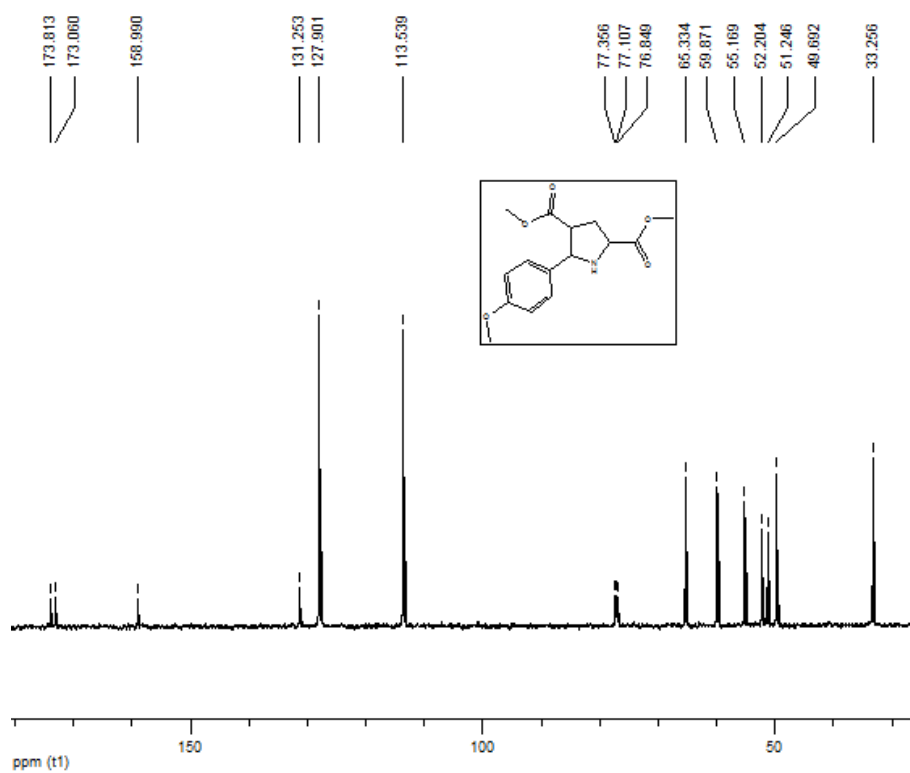

Figure S12

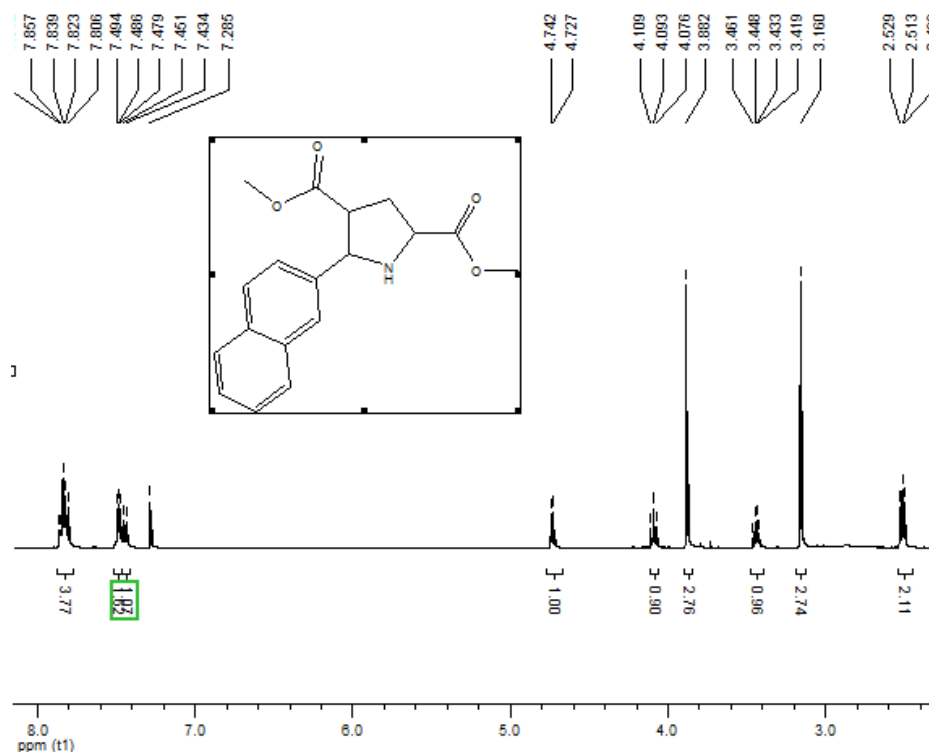

Figure S13

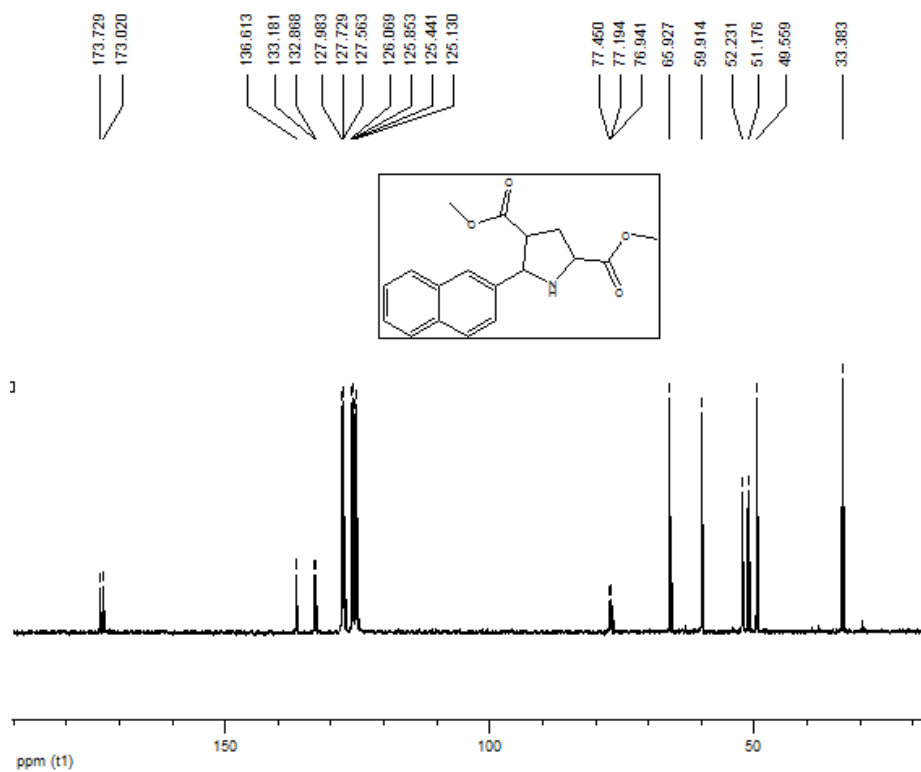

Figure S14



## Figure of Structure

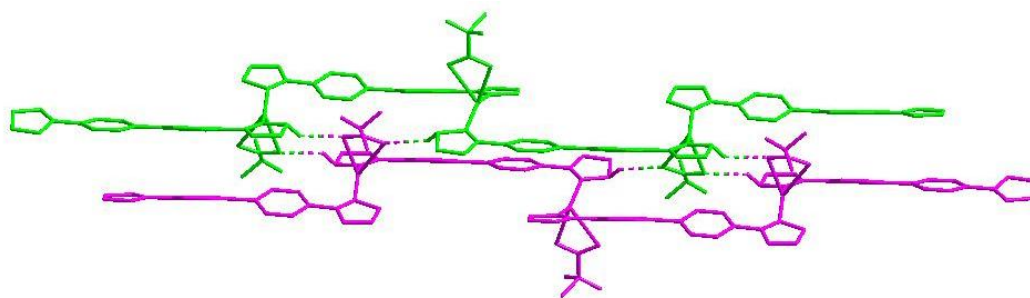

**Figure S15 (a)** 1D double chain of **1** with hydrogen bonds indicated by dashed lines.

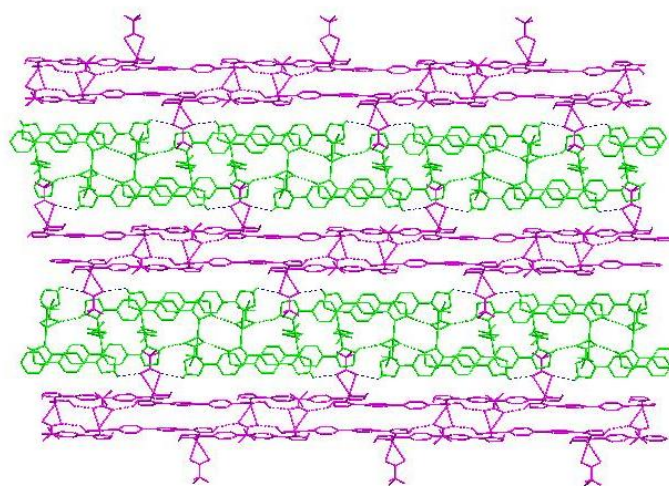

**Figure S15 (b)** 2D network of **1** with hydrogen bonds indicated by dashed lines.

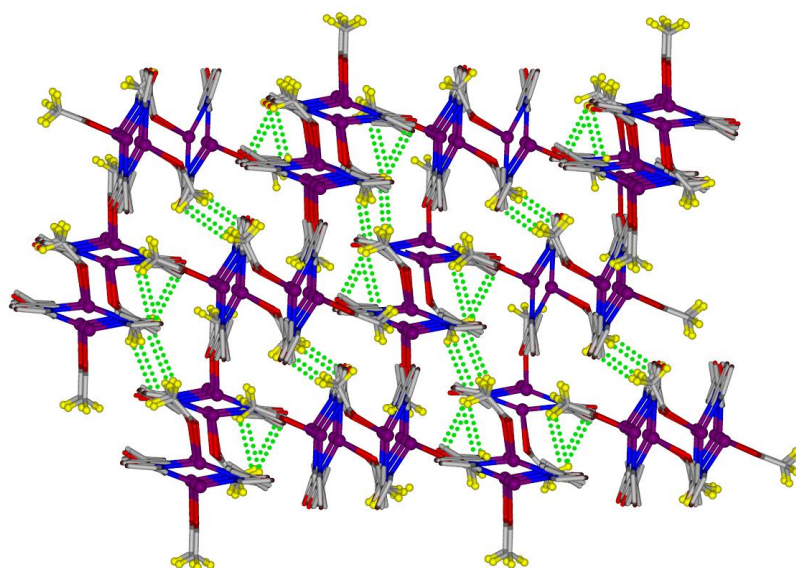

**Figure S15 (c)** 3D structure of **1** with hydrogen bonds indicated by dashed lines.

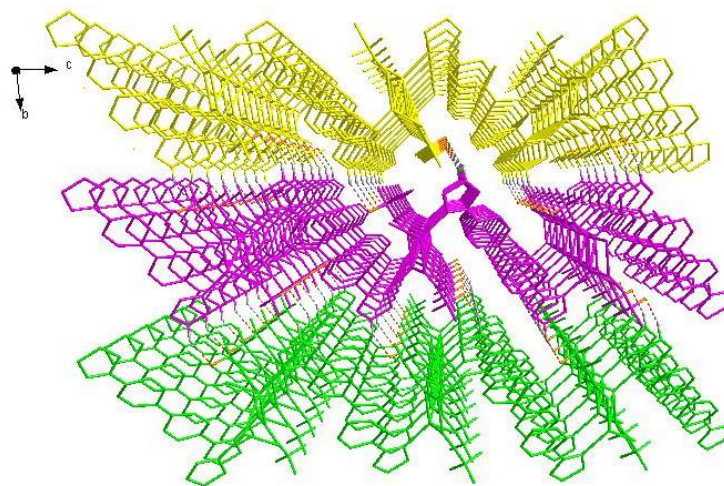

**Figure S16** 3D structure of **2** with hydrogen bonds indicated by dashed lines.

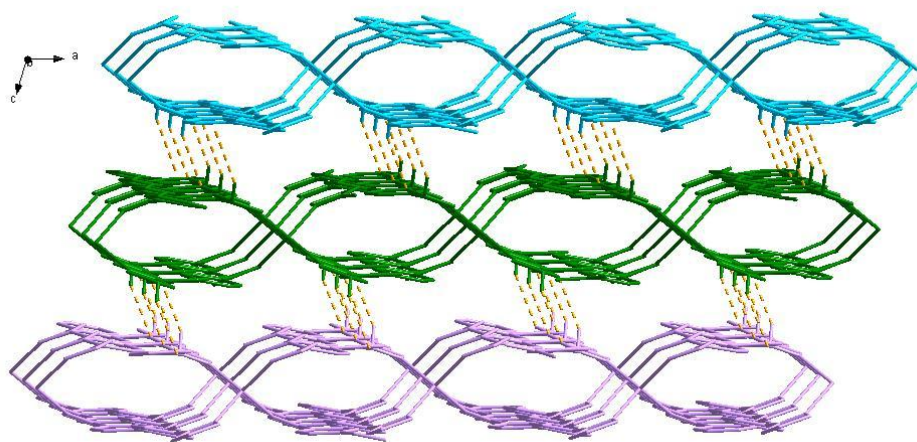

**Figure S17** 3D structure of **3** with hydrogen bonds indicated by dashed lines,  $\text{CF}_3\text{COO}^-$  are omitted for clarity.
